# Supplementary material for: Electrochemical performance of NASICON type carbon coated LiTi2(PO4)3 with a spinel LiMn2O4 cathode
Source: Royal Society of Chemistry journal article supplement (doi:10.1039/c2ra20826a), 2012-01-01
Supplement: c2ra20826a.pdf [file c2ra20826a.pdf]

## Supplementary information

### Commercial $\text{LiMn}_2\text{O}_4$

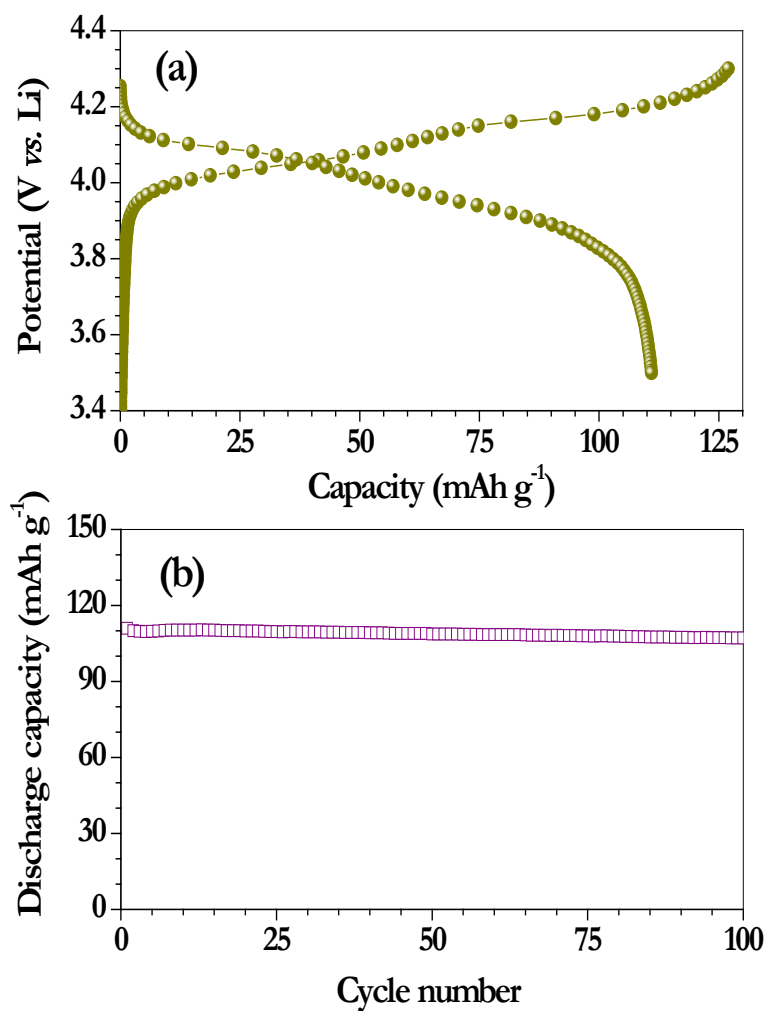

**Figure** Galvanostatic cycling performance (a) First charge-discharge curves of  $\text{Li}/\text{LiMn}_2\text{O}_4$  cell between 3.5-4.3 V at current density of  $150 \text{ mA g}^{-1}$  and (b) Plot of discharge capacity *vs.* cycle number (100 cycles)
